# Supplementary material
Source: MDPI journal article supplement (https://www.mdpi.com/2304-6775/8/2/18)
Supplement: s1 [file s1]

**Table S1. List of Included Schools**

|                                                         |                                             |
|---------------------------------------------------------|---------------------------------------------|
| Albany College of Pharmacy and Health Sciences          | University of California, San Diego         |
| Chapman University                                      | University of California, San Francisco     |
| Florida A&M University                                  | University of Cincinnati                    |
| Medical University of South Carolina                    | University of Colorado                      |
| North Dakota State University                           | University of Connecticut                   |
| Northeastern University                                 | University of Florida                       |
| Oregon State University                                 | University of Houston                       |
| Purdue University                                       | University of Illinois at Chicago           |
| Rutgers, The State University of New Jersey             | University of Kentucky                      |
| Temple University                                       | University of Maryland                      |
| Texas Tech University Health Sciences Center            | University of Michigan                      |
| The Ohio State University                               | University of Minnesota                     |
| The University of Arizona                               | University of Nebraska Medical Center       |
| The University of Georgia                               | University of North Carolina at Chapel Hill |
| The University of Iowa                                  | University of Pittsburgh                    |
| The University of Kansas                                | University of Rhode Island                  |
| The University of Mississippi                           | University of South Carolina                |
| The University of Montana                               | University of Southern California           |
| The University of New Mexico                            | University of Washington                    |
| The University of Tennessee                             | University of Wisconsin-Madison             |
| The University of Texas at Austin                       | Virginia Commonwealth University            |
| The University of Utah                                  | Washington State University                 |
| University at Buffalo, the State University of New York | Wayne State University                      |
| University of Arkansas for Medical Sciences             | West Virginia University                    |

**Table S2. Expanded Correlations For Metrics Between All Databases**

|                                | Documents Scopus | H-index Scopus | Total Citations Scopus | Highest Cited Scopus | Documents WOS | H-index WOS | Total Citations WOS | Highest Article WOS | Documents Google Scholar | H-index Google Scholar | Total Citations Google Scholar | Highest Cited Google Scholar | Documents ResearchGate | H-index ResearchGate | Total Citations ResearchGate |
|--------------------------------|------------------|----------------|------------------------|----------------------|---------------|-------------|---------------------|---------------------|--------------------------|------------------------|--------------------------------|------------------------------|------------------------|----------------------|------------------------------|
| Documents Scopus               | 1.000            | 0.951          | 0.926                  | 0.808                | 0.960         | 0.923       | 0.900               | 0.781               | 0.930                    | 0.917                  | 0.875                          | 0.682                        | 0.888                  | 0.855                | 0.830                        |
| H-index Scopus                 | 0.951            | 1.000          | 0.979                  | 0.879                | 0.947         | 0.974       | 0.958               | 0.854               | 0.851                    | 0.965                  | 0.943                          | 0.778                        | 0.830                  | 0.904                | 0.889                        |
| Total Citations Scopus         | 0.926            | 0.979          | 1.000                  | 0.936                | 0.921         | 0.954       | 0.969               | 0.903               | 0.813                    | 0.935                  | 0.967                          | 0.859                        | 0.802                  | 0.882                | 0.900                        |
| Highest Cited Scopus           | 0.808            | 0.879          | 0.936                  | 1.000                | 0.797         | 0.848       | 0.901               | 0.931               | 0.634                    | 0.775                  | 0.868                          | 0.933                        | 0.668                  | 0.766                | 0.828                        |
| Documents WOS                  | 0.960            | 0.947          | 0.921                  | 0.797                | 1.000         | 0.966       | 0.940               | 0.818               | 0.914                    | 0.922                  | 0.884                          | 0.698                        | 0.864                  | 0.864                | 0.840                        |
| H-index WOS                    | 0.923            | 0.974          | 0.954                  | 0.848                | 0.966         | 1.000       | 0.978               | 0.872               | 0.837                    | 0.947                  | 0.928                          | 0.773                        | 0.807                  | 0.885                | 0.872                        |
| Total Citations WOS            | 0.900            | 0.958          | 0.969                  | 0.901                | 0.940         | 0.978       | 1.000               | 0.940               | 0.803                    | 0.924                  | 0.952                          | 0.845                        | 0.782                  | 0.869                | 0.889                        |
| Highest Article WOS            | 0.781            | 0.854          | 0.903                  | 0.931                | 0.818         | 0.872       | 0.940               | 1.000               | 0.631                    | 0.765                  | 0.851                          | 0.900                        | 0.656                  | 0.757                | 0.818                        |
| Documents Google Scholar       | 0.930            | 0.851          | 0.813                  | 0.634                | 0.914         | 0.837       | 0.803               | 0.631               | 1.000                    | 0.901                  | 0.856                          | 0.656                        | 0.891                  | 0.811                | 0.771                        |
| H-index Google Scholar         | 0.917            | 0.965          | 0.935                  | 0.775                | 0.922         | 0.947       | 0.924               | 0.765               | 0.901                    | 1.000                  | 0.960                          | 0.780                        | 0.832                  | 0.917                | 0.889                        |
| Total Citations Google Scholar | 0.875            | 0.943          | 0.967                  | 0.868                | 0.884         | 0.928       | 0.952               | 0.851               | 0.856                    | 0.960                  | 1.000                          | 0.893                        | 0.793                  | 0.900                | 0.924                        |
| Highest Cited Google Scholar   | 0.682            | 0.778          | 0.859                  | 0.933                | 0.698         | 0.773       | 0.845               | 0.900               | 0.656                    | 0.780                  | 0.893                          | 1.000                        | 0.605                  | 0.746                | 0.827                        |
| Documents ResearchGate         | 0.888            | 0.830          | 0.802                  | 0.668                | 0.864         | 0.807       | 0.782               | 0.656               | 0.891                    | 0.832                  | 0.793                          | 0.605                        | 1.000                  | 0.931                | 0.906                        |
| H-index ResearchGate           | 0.855            | 0.904          | 0.882                  | 0.766                | 0.864         | 0.885       | 0.869               | 0.757               | 0.811                    | 0.917                  | 0.900                          | 0.746                        | 0.931                  | 1.000                | 0.975                        |
| Total Citations ResearchGate   | 0.830            | 0.889          | 0.900                  | 0.828                | 0.840         | 0.872       | 0.889               | 0.818               | 0.771                    | 0.889                  | 0.924                          | 0.827                        | 0.906                  | 0.975                | 1.000                        |
